# Supplementary material
Source: PubMed Central journal article supplement (PMC5718570)
Supplement: AnnalsATS.201701-081OC_lipner_data_supplement.pdf [file AnnalsATS.201701-081OC_lipner_data_supplement.pdf]

## **DATA SUPPLEMENT**

### **A Geospatial Epidemiologic Analysis of Nontuberculous Mycobacterial Infection: An Ecological Study in Colorado**

Ettie M. Lipner, Ph.D, M.P.H., David Knox, Ph.D, Joshua French, Ph.D, Jordan Rudman,  
Michael Strong, Ph.D, James L. Crooks, Ph.D, M.S.

#### **SUPPLEMENTARY FIGURE LEGEND**

**Figure E1. Water Collection System map, Denver Water.** Black dotted line represents the Continental Divide. Blue lines represent tunnels transporting water from the western slope across the Continental Divide. Red squares represent the locations of the Denver Water treatment plants.

**Figure E2. Significant watersheds with Denver Water tunnel system superimposed.** Blue dotted line represents Roberts Tunnel transporting water from Dillon Reservoir into the South Platte River. Blue lines represent system of tunnels and rivers transporting water to three Denver Water treatment plants (Blue squares).

Figure E1.

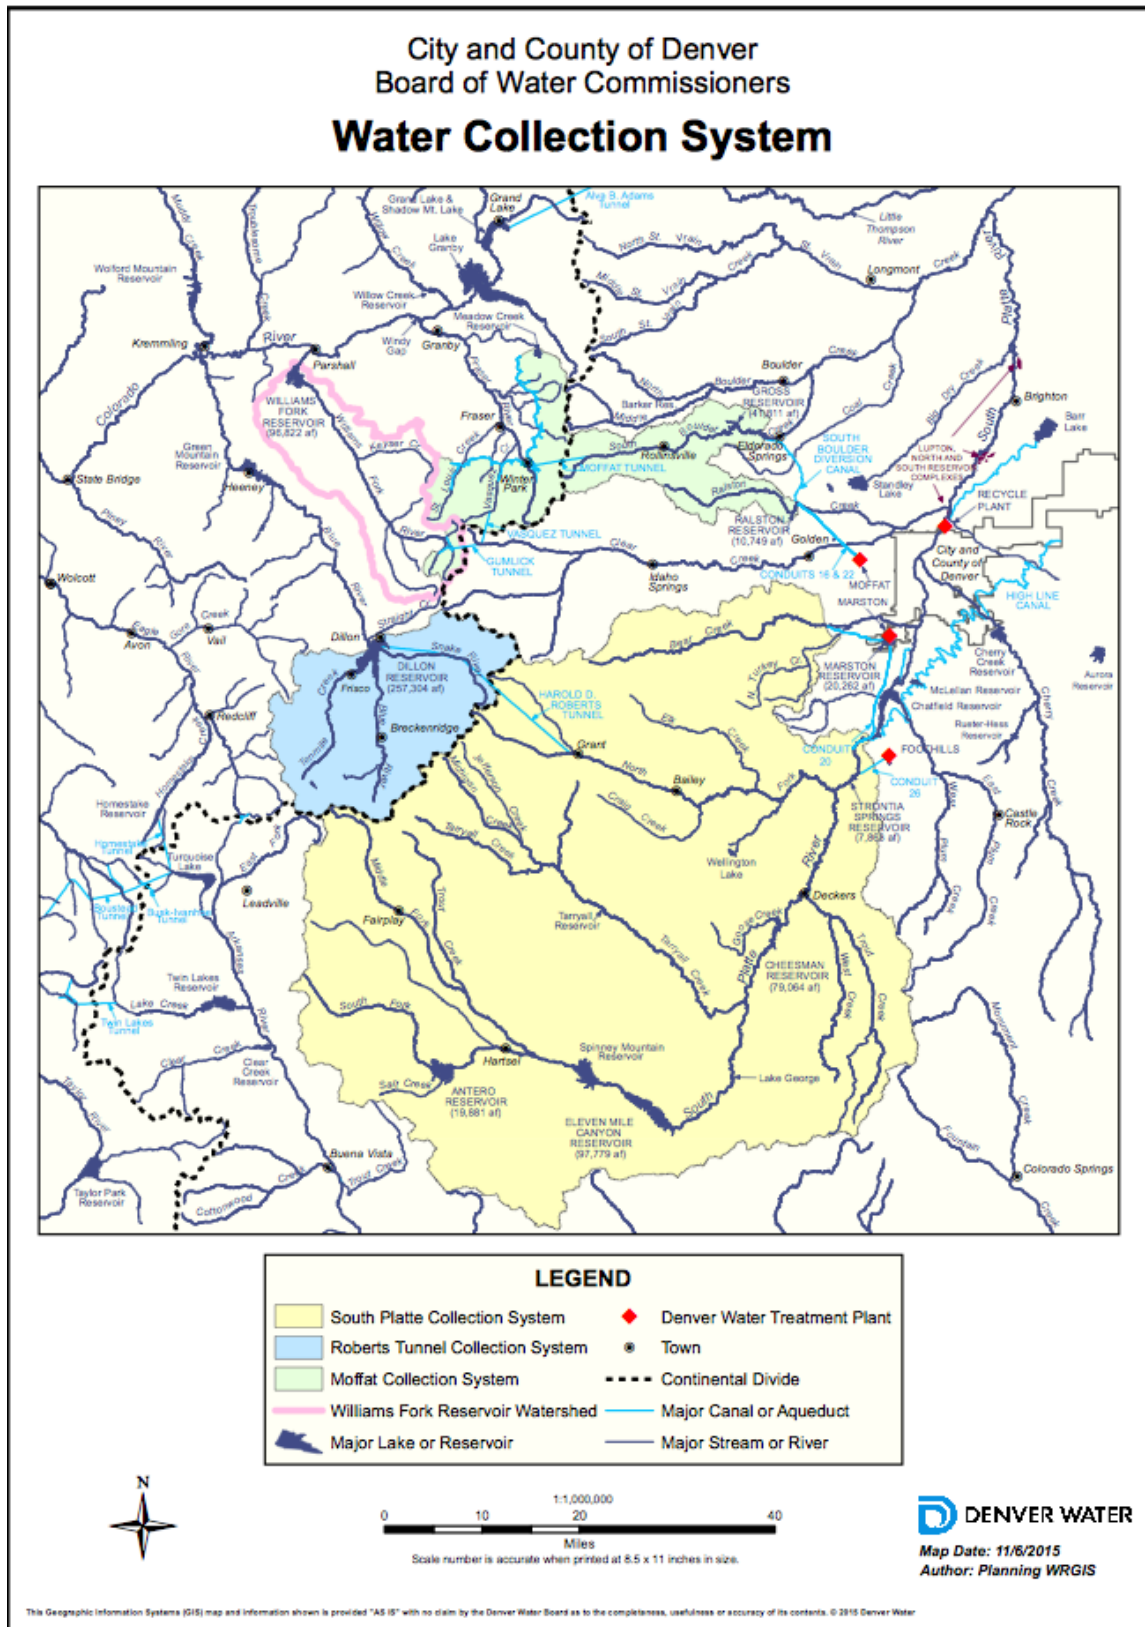

Figure E2.

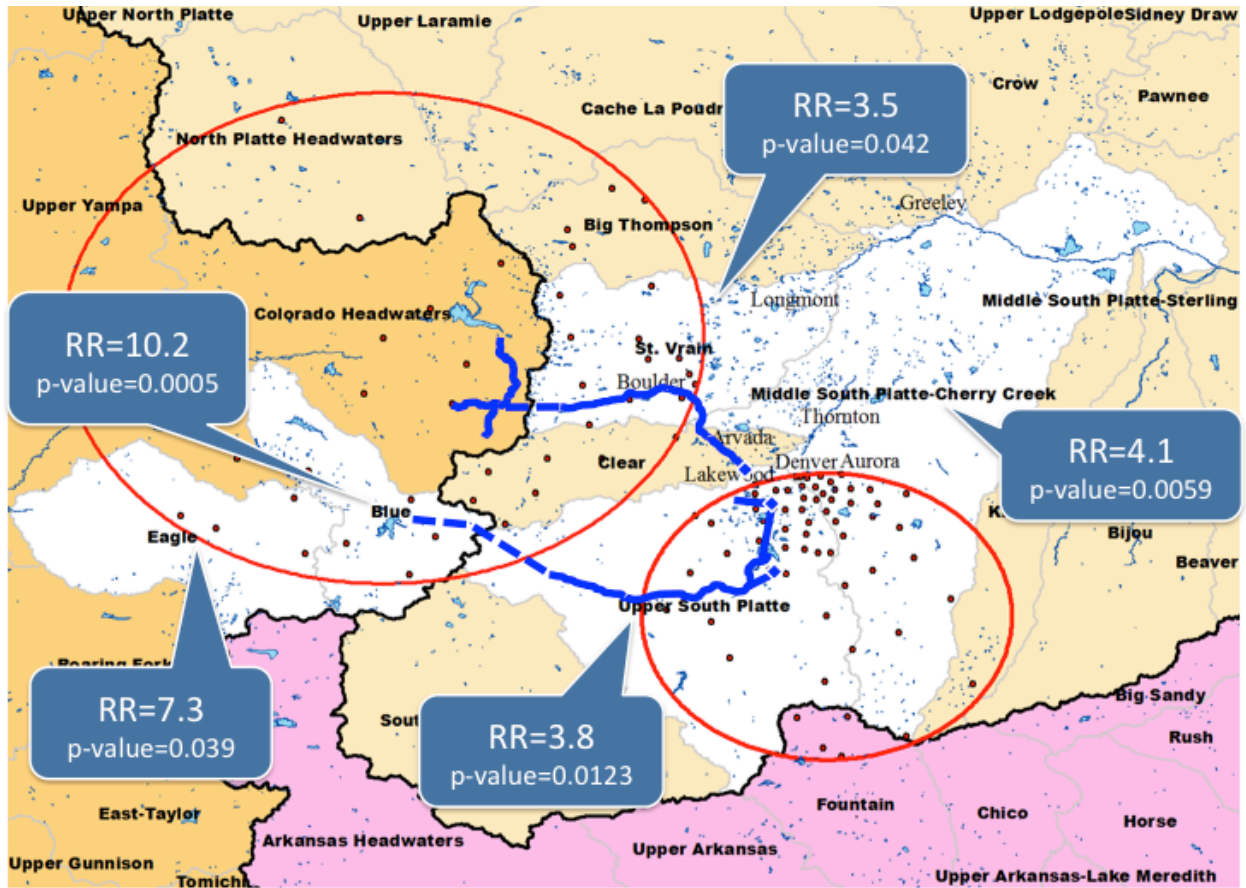

**TABLE E1.****Species grouped as Slowly-growing NTM & Rapidly-growing NTM.**

| <b>Slowly-growing NTM species</b> | <b>Rapidly-growing NTM species</b> |
|-----------------------------------|------------------------------------|
| M. AVIUM                          | M. ABSCESSUS                       |
| M. CHIMAERA                       | M. CHELONAE                        |
| M. INTRACELLULARE                 | M. FORTUITUM                       |
| M. MARSEILLENSE                   | M. MUCOGENIUM                      |
| M. TIMONENSE                      | M. PORCINUM                        |
| M. GORDONAE                       | M. FLAVESCENS                      |
| M. TRIPLEX                        | M. RHODESIAE                       |
| M. SZULGAI                        | M. GOODII                          |
| M. SIMIAE                         | M. SMEGMATIS                       |
| M. KANSASHII                      | M. CONCEPTIONENSE                  |
| M. SCROFULACEUM                   | M. AUBAGNENSE                      |
| M. COLOMBIENSE                    | M. SENEGALENSE                     |
| M. AROSIENSE                      | M. SEPTICUM                        |
| M. NEBRASKENSE                    | M. WOLINSKYI                       |
| M. PARASCROFULACEUM               | M. GADIUM                          |
| M. VULNERIS                       | M. HOLSATICUM                      |
| M. LENTIFLAVUM                    | M. ALVEI                           |
| M. NONCHROMOGENICUM               | M. MAGERITENSE                     |
| M. KUBICAE                        | M. PHOCAICUM                       |
| M. PARAFFINICUM                   | M. IMMUNOGENUM                     |
| M. XENOPI                         | M. PEREGRINUM                      |
| M. GENAVENSE                      | M. MUCOGENICUM                     |
| M. INTERJECTUM                    | M. MASSILIENSE                     |
| M. SHIMOIDEI                      | M. BOLLETII                        |
| M. MARINUM                        | M. SEPTICUM                        |
| M. STOMATEPIAE                    | M. BRISBANENSE                     |
| M. TERRAE                         | M. MONACENSE                       |
| M. ARUPENSE                       | M. COSMETICUM                      |
| M. MALMOENSE                      | M. THERMORESISTIBILE               |
| M. KUMAMOTONENSE                  | M. NEOAURUM                        |
| M. YONGONENSE                     |                                    |
| M. BOUCHEDURHONENSE               |                                    |
| M. IRANICUM                       |                                    |
| M. HERAKLIONENSE                  |                                    |
| M. CELATUM                        |                                    |
| M. AVIUM-INTRACELLULARE           |                                    |
| M. KYORINENSE                     |                                    |
| M. ASIATICUM                      |                                    |
| M. MANTENII                       |                                    |
